# Supplementary material for: Susceptibility of consolidated procedural memory to interference is independent of its active task-based retrieval
Source: PubMed Central journal article supplement (PMC6336251; doi:10.1371/journal.pone.0210876), 2019-01-17
Supplement: pone.0210876.s001.pdf [file pone.0210876.s001.pdf]

**Demographic information and sleep duration.**

| Group   | Females<br>(N) | Males<br>(N) | Age<br>(years) | Night sleep 1<br>(self report) | Night sleep 2<br>(self report) |
|---------|----------------|--------------|----------------|--------------------------------|--------------------------------|
| NoReInt | 7              | 8            | 23.16 ± 2.38   | 7h 50 min ± 49 min             | 8h 2 min ± 53 min              |
| ReInt   | 11             | 9            | 25.25 ± 4.56   | 8h 5 min ± 57 min              | 8h 2 min ± 53min               |
| Re8hInt | 10             | 5            | 24.60 ± 3.53   | 7h 34 min ± 49 min             | 7 h 24 min ± 56 min            |
